# The Dynamics, Causes and Possible Prevention of Hepatitis *E* Outbreaks

Betty Nannyonga<sup>1\*</sup>, David J. T. Sumpter<sup>2</sup>, Joseph Y. T. Mugisha<sup>1</sup>, Livingstone S. Luboobi<sup>1</sup>

<sup>1</sup> Department of Mathematics, Makerere University, Kampala, Uganda, <sup>2</sup> Mathematics Department, Uppsala University, Uppsala, Sweden

## Abstract

Rapidly spreading infectious diseases are a serious risk to public health. The dynamics and the factors causing outbreaks of these diseases can be better understood using mathematical models, which are fit to data. Here we investigate the dynamics of a Hepatitis *E* outbreak in the Kitgum region of northern Uganda during 2007 to 2009. First, we use the data to determine that  $\mathcal{R}_0$  is approximately 2.25 for the outbreak. Secondly, we use a model to estimate that the critical level of latrine and bore hole coverages needed to eradicate the epidemic is at least 16% and 17% respectively. Lastly, we further investigate the relationship between the co-infection factor for malaria and Hepatitis *E* on the value of  $\mathcal{R}_0$  for Hepatitis *E*. Taken together, these results provide us with a better understanding of the dynamics and possible causes of Hepatitis *E* outbreaks.

**Citation:** Nannyonga B, Sumpter DJT, Mugisha JYT, Luboobi LS (2012) The Dynamics, Causes and Possible Prevention of Hepatitis *E* Outbreaks. PLoS ONE 7(7): e41135. doi:10.1371/journal.pone.0041135

**Editor:** Yury E. Khudyakov, Centers for Disease Control and Prevention, United States of America

**Received:** April 21, 2012; **Accepted:** June 18, 2012; **Published:** July 24, 2012

**Copyright:** © 2012 Nannyonga et al. This is an open-access article distributed under the terms of the Creative Commons Attribution License, which permits unrestricted use, distribution, and reproduction in any medium, provided the original author and source are credited.

**Funding:** BN acknowledges the International Science Program - ISP for the funding of this study and the Mathematics Institute of Uppsala University, Sweden. The funders had no role in study design, data collection and analysis, decision to publish, or preparation of the manuscript.

**Competing Interests:** The authors have declared that no competing interests exist.

\* E-mail: bnk@math.mak.ac.ug

## Introduction

Outbreaks of diseases such as avian influenza, SARS and West Nile Virus have alerted us to the potentially grave public health threat from emerging and re-emerging pathogens [1–3]. Many important infectious diseases persist on a knife-edge: rapid rates of transmission coupled with brief infectious periods. Such violent epidemic behavior has been observed in plague [4], cholera [5], pertussis [6] and more recently Hepatitis *E*. The recent outbreak of Hepatitis *E* in northern Uganda, has left many dead and a number of infectives that continue to spread the infection [7]. Hepatitis *E* is caused by infection with the Hepatitis *E* virus (HEV) which has a fecal-oral transmission route. It is a self-limiting disease but occasionally develops into an acute severe liver disease. As emerging and re-emerging infectious diseases increase in outbreak frequency, there is a compelling interest in understanding their dynamics [8–10].

The Kitgum outbreak, which we study here, has been linked to contaminated water or food supplies [11]. An assessment conducted by the Uganda Red Cross and district representatives in Agoro revealed that for a population of about 28,045 with 6,039 households mainly living in camps for internally displaced people in Potika as well as Agoro and Oboko satellite camps, the latrine coverage was as low as 3.7%. This means that there is one latrine for every 27 people. Further, only 23 boreholes were functional implying that the bore hole coverage is 0.38%, or one bore hole per 263 households.

Another possible factor that could be implicated in the outbreak of Hepatitis *E* is its possible relationship with malaria. Malaria has been shown to disarm the immune system and increase susceptibility to viral infections such as HIV [11]. Recently, in a 3-month follow-up study the pattern of co-infection of *Plasmodium*

*falciparum* malaria and acute Hepatitis *A* (HAV), in 222 Kenyan children under the age of 5 years was observed [12]. The incidence of HAV infections during *P. falciparum* malaria was found to be 6.3 times higher than the cumulative incidence of HAV, suggesting that co-infection of the two pathogens may result from changes in host susceptibility. There is also evidence both for [13,14] and against [15,16] an association between Hepatitis B viruses and malaria. HEV transmission route is similar to the Hepatitis A virus and thus for HEV it is important to consider possible links to co-infection with malaria. This can be done using mathematical models of multiple pathogens [17–22].

In this paper, mathematical models are used to study the effects of both environmental conditions and malaria on Hepatitis *E* infections. The models designed are fit to data from the Kitgum outbreak, to estimate the basic reproduction number and to relate them to the level of contamination of the environment. We assume that the small number of latrines [23], leads to contamination of environment. This in turn leads to contaminated water. Owing to the few number of bore holes in the region, lack of access to clean water gives rise to the viral infection of Hepatitis *E*.

## Results

We formulate two mathematical models: one for Hepatitis *E* only and another for the co-infection with malaria, based on prior work as in [4,24,25]. In their framework, an individual is categorized according to their infection status and passes sequentially through the series of non infectious, infectious and recovered classes. A system of ordinary differential equations are then designed, analyzed and later fit to data from the Hepatitis *E* outbreak in Kitgum district to estimate desired parameters.

### Hepatitis E Model

First we model the epidemiology of Hepatitis E, an environmentally transmitted viral infection. The dynamics of the disease are an *SEIR* framework, i.e. Susceptible, Exposed, Infectious and Recovered. Hepatitis E virus is mainly spread by the fecal-oral route. This results either from directly touching the contaminated environment and eat without washing hands, or drinking contaminated water. In Kitgum district Uganda, most people live in internally displaced camps. The number of latrines in the area are not enough for the entire population, [11], and people use the local environment for this purpose. When rain falls, it washes the faeces into water bodies. In the Kitgum region, few people have access to clean bore hole water [11], and therefore collect water from the contaminated water sources. To model this phenomenon we use  $l$ , to denote the proportion of households in Kitgum with access to latrines. Therefore, the rate of change of contamination  $c$  of the environment is given by

$$\frac{dc}{dt} = \rho(1-l)I - c, \tag{1}$$

where  $\rho$  is the transmission rate of *HEV* from the infected human,  $I$ , to the environment.

In the human population, susceptibles,  $S$ , are recruited at a rate  $\mu$  that equals to the per capita natural mortality rate for each group. This assumption is made to keep the population constant, while keeping a turnover of individuals in the population. We assume that a fraction  $b$  of the population has access to clean bore hole water and cannot become infected. Susceptible individuals without bore hole access become infected with the Hepatitis E virus at a rate  $\beta c$ , where  $\beta$  is the transmission rate of *HEV* from the contaminated environment  $c$ , to the human. This gives

$$\frac{dS}{dt} = \mu - (1-b)\beta cS - \mu S. \tag{2}$$

After successful infection, the individual is now exposed to *HEV* and moves to the exposed class  $E$ . The incubation period takes a mean period of  $\frac{1}{\sigma}$  days. The equation for this group is given by

$$\frac{dE}{dt} = \beta c - (\mu + \sigma)E. \tag{3}$$

At the end of the incubation period  $\frac{1}{\sigma}$ , the individual becomes infectious and moves to group  $I$ . At this point, they display signs and symptoms that include fever, fatigue, loss of appetite, nausea, vomiting, abdominal pain, jaundice, dark urine, clay-colored stool and joint pain [26]. The infected individual may recover at a rate  $\gamma$ . These dynamics are given by

$$\frac{dI}{dt} = \sigma E - (\mu + \gamma)I. \tag{4}$$

Of the total infected individuals, a fraction  $p$  of them die due to the infection, and  $(1-p)$  recover to join the immune group  $R$ . This implies that

$$\frac{dR}{dt} = (1-p)gI - \mu R. \tag{5}$$

Equations (1) to (5) provide a system of equations defining the transmission of *HEV* between a contaminated environment and humans. Assuming that the dynamics of the environment are fast. This means that the environment reaches a steady-state before the humans. The quasi-stationary-state (*QSS*) for  $c$  can be obtained from equation (1) to give

$$c_* = \rho(1-l)I. \tag{6}$$

This steady state is then substituted in the human equations to give a reduced system of equations as follows:

$$\frac{dS}{dt} = \mu - \beta\rho(1-l)(1-b)IS - \mu S,$$

$$\frac{dE}{dt} = \beta\rho(1-l)(1-b)IS - (\mu + \sigma)E,$$

$$\frac{dI}{dt} = \sigma E - (\mu + g)I, \tag{7}$$

$$\frac{dR}{dt} = (1-p)gI - \mu R.$$

As in [27,28], in this system,  $1 = S + E + I + R$ . Thus, the last equation in (7) is redundant. This system of equations will be analyzed and fit to data.

The endemic stationary state is given by

$$S_* = \frac{1}{\mathcal{R}_0}, E_* = \frac{\mu(\mu + \gamma)}{\sigma\beta\rho(1-l)(1-b)}(\mathcal{R}_0 - 1), \tag{8}$$

$$I_* = \frac{\mu}{\beta\rho(1-l)(1-b)}(\mathcal{R}_0 - 1), R_* = 1 - S_* - E_* - I_*,$$

where

$$\mathcal{R}_0 = \frac{\sigma\beta\rho(1-l)(1-b)}{(\mu + \sigma)(\mu + \gamma)} \tag{9}$$

is the basic reproduction number for *HEV*. The term  $\frac{\sigma}{\mu + \sigma}$  is the proportion of the exposed humans that survive the incubation period. The other fraction,  $\frac{\beta\rho(1-l)(1-b)}{\mu + \gamma}$  is transmission rate of *HEV* during the infectious period of the human.

The disease-free equilibrium point is stable if  $\mathcal{R}_0 < 1$  (see Supporting Information S1) When  $\mathcal{R}_0 > 1$  the endemic equilibrium point in equation (8) exists and is stable. This equilibrium is attained via oscillatory dynamics, with period  $T \sim 2p\sqrt{AG}$ , where  $A = \frac{1}{\mu(\mathcal{R}_0 - 1)}$  is the mean age at infection, and  $G = \frac{1}{\mu + \sigma} + \frac{1}{\mu + \gamma}$  is the ecological generation length of the infection.

Figure 1a is a plot of the data for the outbreak from 2007 through 2009. To estimate model parameters and determine the critical level of control needed to eradicate the epidemic, the model described by the equations in (7) is fit to the data collected during the Kitgum outbreak (Figure 1) During the invasion phase of *HEV*, the prevalence is approximately

$$I(t) \approx I(0) \exp\left(\frac{1}{2} \left[ \sqrt{4(\mathcal{R}_0 - 1)\sigma\gamma + (\sigma + \gamma)^2} - (\sigma + \gamma) \right] t\right) \quad (10)$$

Taking the log of both sides of equation (10) and performing linear regression (details in Supporting Information S1) on this equation, (Figure 1b), gives  $\log(I(0)/N) = -8.8364$ . This implies that the initial number of infectives,  $I(0) \approx 4$ . In addition,  $\frac{1}{2} \left[ \sqrt{4(\mathcal{R}_0 - 1)\sigma\gamma + (\sigma + \gamma)^2} - (\sigma + \gamma) \right] = 0.1465$ . Substituting in known parameter values for the Kitgum region  $s = 1/6$ ,  $g = 1$  gives an estimated value  $\mathcal{R}_0 = 2.15$ .

To determine  $\mathcal{R}_0$  when natural mortality is not equal to zero, (i.e.  $\mu > 0$ ), we use a non-linear differential equation fitting tool, called the PottersWheel Toolbox [29]. In this fitting technique, the  $c^2$  value of the sum of the squares of the differences between the observed and fitted values is minimized by searching through different parameter values. We set  $\mu = 0.0004$ ,  $p = 0.0169$ ,  $b = 0.0038$ ,  $l = 0.0037$ , and fit the free parameters,  $\sigma, \gamma$ , and the force of transmission  $\beta\rho$ . We repeat this process 50 times to produce a range of best fits. The basic reproduction number for each run is then calculated using the expression in equation (9) The fitted parameters estimate the basic reproduction number  $\mathcal{R}_0$  between 2.08- 2.39 with

average 2.25. This value is similar to that found from the linear regression fitting. Figure 1c is a plot of the model outcome using the parameters generated from the fitting to the Kitgum outbreak.

### The Co-infection Model

In addition to Hepatitis E, individuals in the Kitgum region were at a risk of acquiring malaria which is endemic to Uganda. To model possible co-infection we adopt the model to include a susceptible group which comprises both those with and without malaria. That is, the total susceptible population  $S' = S + M$  where  $M$  is the proportion of individuals infected with malaria. The malaria dynamics will not be modelled in detail here but an assumption is made that malaria continuously invades the population, and individuals move back and forth between infection and recovery from the disease. This implies that

$$\frac{dS}{dt} = -fS + rM,$$

$$\frac{dM}{dt} = -rM + fS. \quad (11)$$

The equilibrium state for this model is given by

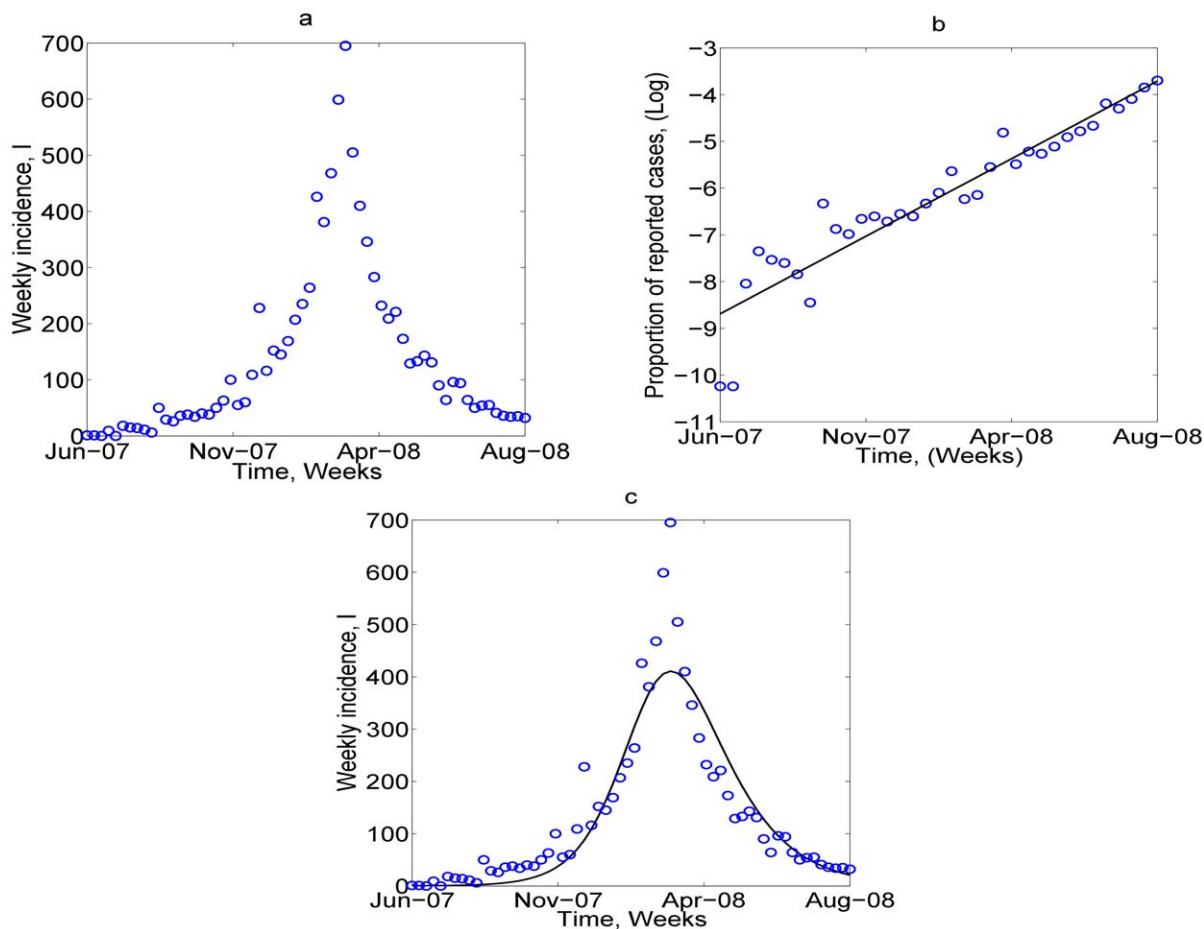

**Figure 1. In this figure, we plot the data from the Kitgum outbreak and show how it was fit to the model.** In (a), we plot the data, which is then fit using (log-)linear regression shown in (b), and then, using parameters from the PottersWheel fitting tool, we run the model again and this is shown in (c) The parameters used are  $\beta\rho = 6.0159$ ,  $\gamma = 2.62283$ ,  $\mu = 0.0004$ ,  $p = 0.0169$ ,  $b = 0.0038$ ,  $l = 0.037$ . doi:10.1371/journal.pone.0041135.g001

$$S_* = \frac{r}{f+r}, \text{ and } M_* = \frac{f}{f+r}. \tag{12}$$

Clearly, this assumption provides a much simplified model when compared to a full model of vector-borne malaria [3,12,27]. Our concern here, however, is how background levels of malaria effect transmission dynamics of HEV. In Kitgum, at its lowest point during March 2009, 2,316 cases of malaria were reported out of a total population of 28,045 [7]. Thus 8.3% of the population are infected with malaria at any time,  $M_* = 0.083$ . Recovery rate for malaria is  $r = 0.1429$  per week, and thus we set  $f = 0.0129$ .

Under the above assumption, equations (7) are rewritten to incorporate the malaria dynamics in equation (11) as follows:

$$\begin{aligned} \frac{dS}{dt} &= -fS + rM - \beta\rho(1-l)(1-b)IS - \mu S, \\ \frac{dM}{dt} &= fS - rM - \xi\beta\rho(1-l)(1-b)IM - \mu M, \\ \frac{dE}{dt} &= \beta\rho(1-l)(1-b)(S + \xi M)I - \mu E - \sigma E, \end{aligned} \tag{13}$$

$$\frac{dI}{dt} = \sigma E - \mu I - \gamma I,$$

$$\frac{dR}{dt} = (1-p)\gamma I - \mu R.$$

where  $\xi$  is a parameter that models change the increase (or decrease) in susceptibility to Hepatitis E of malaria infected individuals [12]. The other parameters are as defined in equations (7) and remain as defined there. We assume here that after exposure to HEV, both the susceptible and malaria infected groups join the exposed, E and subsequently the I group. In other words, individuals that harbor both infections are assumed to develop HEV symptoms at the same speed as those with only HEV. The dynamics of this model for standard parameter values are shown in Figure 2.

Using the next generation method as in van den Driessche and Watmough (2002), [30], the basic reproduction number for Hepatitis E in presence of malaria is given by

$$\mathcal{R}_C = \frac{\beta\rho\sigma(1-l)(1-b)[S + \xi M]}{(\mu + \sigma)(\mu + \gamma)} \equiv [S(t) + \xi M(t)]\mathcal{R}_0, \tag{14}$$

where  $\mathcal{R}_0$  is as defined in equation (9) When  $\mathcal{R}_C < 1$  infected individuals will have more chances of recovery than of transmitting the disease further hence the epidemic will die out. When  $\mathcal{R}_C > 1$ , there exists an endemic equilibrium point as shown in Supporting Information S2 given by

$$I_* = \frac{\xi(\mu+f) + (\mu+r)}{2\xi\beta\rho(1-l)(1-b)} \left[ -1 \pm \frac{2\sqrt{\xi m(\mu+fr)}}{\xi(\mu+f) + (\mu+r)} \sqrt{\frac{[\xi(\mu+fr) + (\mu+r)]^2}{4\xi\mu(\mu+fr)} - 1} \right] \tag{15}$$

If  $\frac{[\xi(\mu+f) + (\mu+r)]^2}{4\xi\mu(\mu+fr)} < 1$ , then the roots of the quadratic equation in  $I_*$  are complex conjugates and of the form  $a+bi$ , where  $i = \sqrt{-1}$ . This implies that the endemic stationary point is attained via damped oscillations. The stability of this point would depend on the sign of the real part,  $a$ . If  $a > 0$ , then the steady state is an unstable spiral, otherwise, it is a stable spiral. If  $\frac{[\xi(\mu+f) + (\mu+r)]^2}{4\xi\mu(\mu+fr)} > 1$ , then we have real roots, and stability of this equilibrium state will depend on the signs of these roots. If both are positive, the steady state is an unstable node; if both are negative, it is a stable node. If one of them is positive and the other negative, the steady state is a saddle point. Figure 2a shows the evolution of the malaria infected, M, the exposed, E, and the infected, I with time, while Figure 2b is a phase space portrait in the SI plane.

From equation (14) it can be seen that the value for  $\mathcal{R}_C$  is determined by the proportions of susceptibles and malaria infectives in the population. Rearranging and assuming that  $S + M = 1$  this equation gives a criteria for an epidemic of

$$\xi > \frac{1/\mathcal{R}_0 + (1-M)}{M}. \tag{16}$$

This criteria is plotted in Figure 3a. As expected, if  $\xi > 1$  then presence of malaria increases the probability of an outbreak of Hepatitis E, while if  $\xi < 1$  the presence of malaria inhibits Hepatitis E.

Assuming that malaria is at equilibrium in the population. (For example week of March 2009, with 2,316 malaria cases), gives  $M_* = 0.083$ , then equation (16) gives a direct relation between  $\xi$  and  $\mathcal{R}_0$ . In fitting the model we note that the transmission rates  $\beta\rho$  and  $\xi$  are not independent. Indeed, using PottersWheel to fit the co-infection model shows that the range of values for  $\beta\rho$  is between 1.28–4.69,  $\gamma$  between 1.01–1.75 and  $\xi$  values are between 0.02–13.27 (Figure 3b) All of these values fall on line corresponding to  $\mathcal{R}_C$  between 2.19–2.48. This relationship follows the same curve as the analytical results in Figure 3a.

To test potential interaction between Hepatitis E and malaria empirically, we now assume that in the absence of malaria, Hepatitis E has  $\mathcal{R}_0 = 1$  and does not spread. Thus malaria is required for the spread of Hepatitis and  $\xi > 1$ . Since  $\mathcal{R}_C = 2.3$  from the data and  $M_* = 0.083$ , then substituting these values in to equation 14 gives  $\xi = 16.9$ . This implies that, under the assumption of co-infection as the factor which promotes Hepatitis E, malaria infected individuals were infected with Hepatitis E up to 16.9 times more than those not infected with malaria. As we gain more information about the role of co-infection, this relationship can be used to improve estimation of  $\beta\rho$ .

As in [25,27], the criterion under which Hepatitis E will invade the population when malaria is endemic is derived in the Supporting Information S3. Thus, Hepatitis E virus invades if

$$\mathcal{R}_0 \frac{f+r}{r}, \tag{17}$$

and the co-infection persists if

$$\xi \frac{f+r(1-\mathcal{R}_0)}{f\mathcal{R}_0}. \tag{18}$$

As in the Hepatitis E-only model, PottersWheel Toolbox is used to

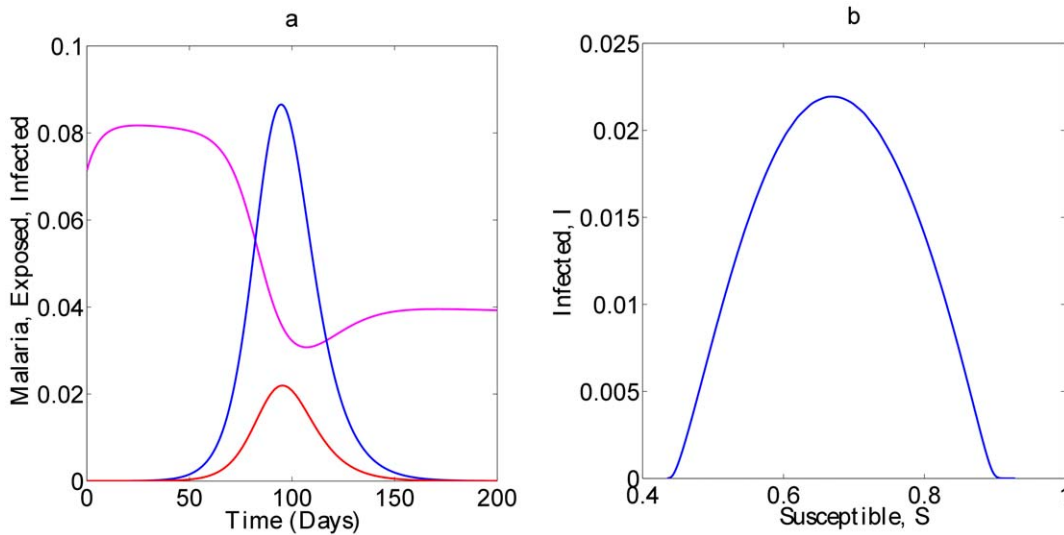

**Figure 2. Evolution of infection with time: Malaria infected,  $M_i$ , are represented by the magenta line, the Exposed,  $E$ , by blue, and the Infected,  $I$  by the red line.** Figure (b) shows the phase space portrait in the  $S-I$  plane.  $\beta\rho$  is 2,  $\gamma=1$ , and  $\xi=3$ . Other parameter values are given in Table 2. doi:10.1371/journal.pone.0041135.g002

investigate the basic reproduction number  $\mathcal{R}_C$ , when natural mortality is not equal to zero, (i.e.  $\mu > 0$ ). A sequence of parameter estimates are generated, this time setting the fits in sequence to 20. The process is repeated until a set of 50 readings is obtained. The parameters are chosen in such a way that  $0.1077 < \sigma < 0.4777$  (i.e.  $15 < 1/\sigma < 64$  days, the Hepatitis E incubation period, [26,31,32]), and  $\chi^2$  value is less than 65. The basic reproduction number for each run is calculated using the expression in equation (14).

**Cost Effective and Decision Support Analysis**

The Global Burden of Disease (*GBD*) concept, first published in 1996, constituted the most comprehensive and consistent set of

estimates of mortality and morbidity yet produced [33]. A *GBD* study aims to quantify the burden of premature mortality and disability for major diseases or disease groups, and uses a summary measure of population health, the *DALY* (Disability-Adjusted Life Years), to combine estimates of the years of life lost and years lived with disabilities. A *DALY* is defined as an indicator to quantify the burden of the disease and the functional limitation and premature mortality [34]. It can be used across cultures to measure health gaps as opposed to health expectancies, and the difference between a current and an ideal situation where everyone lives up to the age of the standard life expectancy, and in perfect health. In developing the *DALY* indicator, Murray and Lopez (1996), [33]

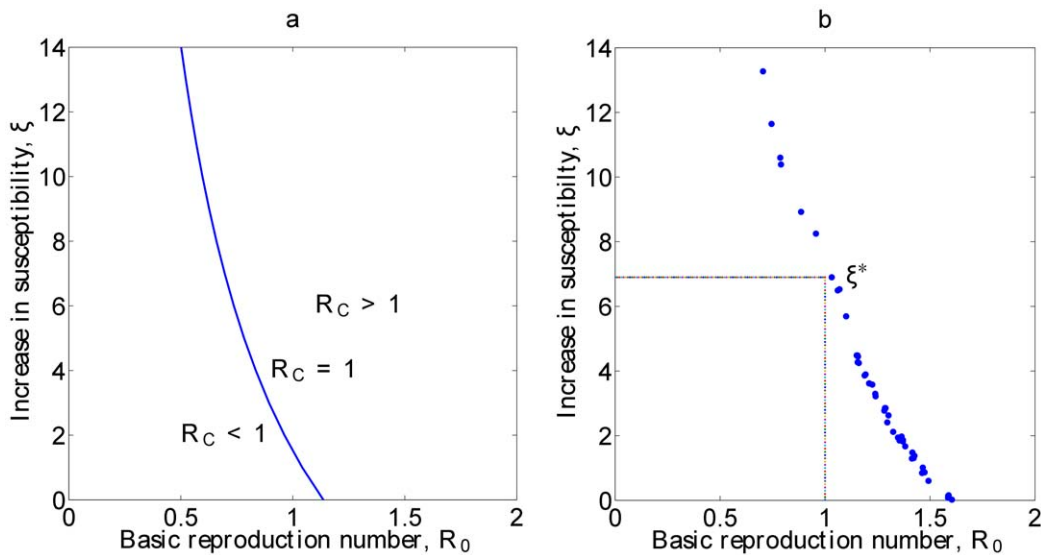

**Figure 3. In this figure, we show the analytical calculation of  $\xi$  against  $\frac{\beta\rho\sigma}{\beta\rho\sigma N \frac{(\mu+\sigma)(\mu+\gamma)}{(\mu+\sigma)(\mu+\gamma)}}$  in (a), with assumption that  $S(0)=1-M(0)$ ,  $M(0)=0.083$ ,  $I=0.037$  and  $b=0.0038$ . The plot of the transmission rate,  $\frac{\beta\rho\sigma N \frac{(\mu+\sigma)(\mu+\gamma)}{(\mu+\sigma)(\mu+\gamma)}}$  against increase in susceptibility to Hepatitis E of malaria infected individuals is shown in (b),  $\xi$ , using parameters estimated from fitting tool. doi:10.1371/journal.pone.0041135.g003**

identified two key value choices: (1) How long should people in good health expect to live? (2) How should we compare years of life lost through death, with years lived with poor health or disability of various levels of severity?

### Calculating the DALYs for Kitgum Outbreak

Since the *DALY* combines in one measure the time lived with disability, *YLD*, and the time lost due to premature mortality, *YLL*, then

$$DALY = YLL + YLD. \tag{19}$$

The *YLL* metric essentially corresponds to the number of deaths, *P*, multiplied by the standard life expectancy, *L*, at the age at which death occurs. Therefore,

$$YLL = P \times L. \tag{20}$$

To estimate *YLD* on a population basis, the number of disability cases is multiplied by the average duration of the disease and a weight factor that reflects the severity of the disease on a scale from 0 (perfect health) to 1 (dead) The basic formula (without applying social preferences) for one disabling event is given by

$$YLD = I \times DW \times D, \tag{21}$$

where *I* is the number of incidence cases, *DW* is the disability weight, and *D* is the average duration of disability.

Since the reported cases are not specified according to age, the estimate will be done on a population basis. Typical symptoms of Hepatitis *E* include jaundice (yellow discoloration of the skin and sclera of the eyes, dark urine and pale stools), anorexia (loss of appetite), an enlarged, tender liver (hepatomegaly), abdominal pain and tenderness, nausea and vomiting, and fever and the disease may range in severity from sub-clinical to fulminant [35]. To calculate the *YLD*, we will set the disability weight to that for a diarrhea disease episode, (equal to 0.11, [33]), in untreated or treated form.

In developing the *DALY* indicator, additional social choices are taken into account. For example, is a year of healthy life gained now worth more to society than a year of healthy life gained sometime in the future? The *DALY* is an incidence-based measure, rather than a prevalence-based measure. Therefore, to estimate the net present value of years of life lost, a time discount rate to years of life lost in the future is applied, to adjust both costs and health outcomes [36]. Discounting health with time reflects the social preference of a healthy year now, rather than in the future. To do this, the value of a year of life is generally decreased annually by a fixed percentage, *d*. Therefore, equations (20) and (21) are respectively transformed to

$$YLL = \frac{P}{d}(1 - e^{-dL}), \text{ and} \tag{22}$$

$$YLD = \frac{I \times DW \times D(1 - e^{-dD})}{d}. \tag{23}$$

According to the WHO [35], the life expectancy for a Ugandan male is 51 and 48 for a female. An average of 50 years will be used. The highest number of reported cases were in the age ranges of 0–44 [23], with average of 22. Further, the total number of deaths due

to Hepatitis *E* in Kitgum as of June 28 2009 were 160. We now calculate the *DALY* for the Hepatitis *E* outbreak in Kitgum district between 2007 and 2009.

From Table 1, for each 1000 individuals in Kitgum, the *YLL* were 108 and the *YLD* equaled to 144. This gave the *DALY*s of 252 per 1000.

### Latrines, Boreholes and Education

The number of latrines and boreholes that would have prevented the Hepatitis *E* outbreak in Kitgum are calculated using our results in preceding sections. First, it is assumed that if the people had the necessary and sufficient number of latrines in addition to safe drinking, then the outbreak would not have occurred. Then, the costs of constructing the required latrines and boreholes are computed. From the results, the cost of saving one life from Hepatitis *E*, for one year is determined.

The current number of latrines in Kitgum is 1,038 [11]. This implies one latrine per 27 people. According to the rules and regulations of Kampala City Council Authority, Building Inspection department, 1 latrine should be shared by a maximum of 5 people. We can use our estimated values of the basic reproduction number  $\mathcal{R}_0$  to determine the level of *l* and *b* that make  $\mathcal{R}_0 < 1$ . First, we use equation (9), the parameters in Table 2, and the value of  $\mathcal{R}_0 = 2.11$ , (linear regression) Assume that contamination is due to insufficient latrines. Then, for  $\mathcal{R}_0 = 1$ , this method estimates that the latrine coverage should be increased to at least 17.1%. This translates into increasing the number of latrines from 1,038 to 4,796 (i.e. 3,756 extra latrines): 1 latrine per 7 people. Similarly, the boreholes should be increased from 23 to 230, that is, 17.7%, or 1 bore hole per 26 households. Similar results are obtained using  $\mathcal{R}_0 = 2.25$  found from the non-linear fitting tool. In this case of Hepatitis *E*-only, the latrines should be increased to 16.1% and boreholes must cover 16.6% of the population. From the co-infection model, latrines should be increased to 17.5%: 4,908, (3,870 extra), 1 for 6 people. Boreholes should be increased to 18.1%, a total of 234, or 1 bore hole per 26 households.

Our model suggests that to eradicate the epidemic, the minimum number of additional latrines required is 3,47. The average cost of digging and constructing a basic pit latrine is approximately USD 250.00 (quotation from city council official) Therefore, 3,477 would cost a total of USD 869,250.00. Thus, the cost per disability adjusted life year averted in Kitgum, in the case of Hepatitis *E* is  $869,250/7,066 = \text{USD } 123.00$ .

**Table 1.** Calculating the *DALY* using the *YLL* and the *YLD*.

| <hr/>                                 |          |                 |                      |           |             |                   |
|---------------------------------------|----------|-----------------|----------------------|-----------|-------------|-------------------|
| <i>YLL</i>                            | -        | -               | -                    | -         | -           | -                 |
| Population                            | <i>P</i> | <i>P</i> /1,000 | Average age at death | <i>L</i>  | <i>YLL</i>  | <i>YLL</i> /1,000 |
| 28,045                                | 160      | 5.71            | 22                   | 28        | 3,030.88    | 108.07            |
| <i>YLD</i>                            | -        | -               | -                    | -         | -           | -                 |
| Population                            | <i>I</i> | <i>I</i> /1000  | <i>D</i> (years)     | <i>DW</i> | <i>YLD</i>  | <i>YLD</i> /1000  |
| 28,045                                | 9,449    | 336.92          | 2                    | 0.11      | 4,035.29    | 143.89            |
| <i>DALY</i> = <i>YLL</i> + <i>YLD</i> | -        | -               | -                    | -         | <i>DALY</i> | <i>DALY</i> /1000 |

The calculation of the *DALY* using parameters from Kitgum. Parameters are as defined in text.

doi:10.1371/journal.pone.0041135.t001



**Table 2.** Realistic parameters for Kitgum district.

| Parameter          | Description                                                 | Value                                   | Reference |
|--------------------|-------------------------------------------------------------|-----------------------------------------|-----------|
| $\mu$              | Per capita death rate of humans                             | 0.0004/person/day                       | [35]      |
| $\gamma$           | Per capita rate of recovery from HEV                        | 0.0238–0.1429/day                       | [11]      |
| $\rho$             | The proportion that died during the outbreak                | $\frac{160}{9449}$                      | [23]      |
| $\beta$            | Transmission rate: human to environment                     | –                                       | Estimated |
| $\rho$             | Transmission rate: environment to human                     | –                                       | Estimated |
| $\xi$              | Moderation parameter for susceptibility to HEV              | –                                       | –         |
| –                  | If malaria promotes HEV                                     | $1 >$                                   | Estimated |
| –                  | If malaria inhibits HEV                                     | $< 1$                                   | Estimated |
| $\frac{1}{\sigma}$ | The latent period of HEV                                    | $15 < \frac{1}{\sigma} < 64/\text{day}$ | [26,32]   |
| $l$                | The proportion of humans with latrines                      | 3.7%                                    | [11]      |
| $b$                | The proportion of humans with bore hole water               | 0.38%                                   | [11]      |
| $\tau$             | Modification parameter for the recovery period              | –                                       | –         |
| –                  | of dually infected                                          | $0 < \tau < 1$                          | Estimated |
| $\varepsilon$      | Modification parameter for the incubation period            | –                                       | –         |
| –                  | of dually infected                                          | $0 < \varepsilon < 1$                   | Estimated |
| $r$                | Recovery rate from malaria by humans                        | $\frac{1}{7}/\text{day}$                | [27]      |
| $f$                | Infection rate of malaria in humans                         | 0.0129                                  | Estimated |
| $d$                | Real discount rate to adjust both costs and health outcomes | 3%                                      | [36]      |

Table showing parameters of the model with their description, values and reference.  
doi:10.1371/journal.pone.0041135.t002

In addition to improving hygiene we should consider education. Let us now consider the case of education to the camp dwellers. Taking the simplest and cheapest scenario of hiring twenty (20) guidance and counseling officials to educate the dwellers about hepatitis E for about a month (that is 30) days, moving around the camp. Let us assign each counselor, 10 households per day. We then calculate the total amount in USD that would facilitate such an exercise as shown in Table 3. From the calculations, it is seen that 104,000 USD would be required. Assuming the success of such an operation this translates into  $104,000/7,066 = \text{USD } 14.71$  cost per disability adjusted life year.

## Discussion

The epidemic of HEV in Kitgum lasted a period of over two years [7]. Within this period, 160 individuals have lost their lives. As a result, the disease burden, the functional limitation and

premature mortality have equaled a disability adjusted life years equal to 7,066, even allowing for the relatively low life expectancy in this part of Uganda. This paper provides a case study of how a simple epidemic model can be fit to such an outbreak disease. Two fitting methods have been used; the first, an analytical method and the other based on a freely available fitting tool. Using these methods, a reliable estimate of  $\mathcal{R}_0 \approx 2.2$  has been provided.

We then use the model to find the measures to keep  $\mathcal{R}_0 < 1$ . The necessary levels of latrine and bore hole coverages needed to eradicate the epidemic are both around 16 to 18%. Although the cost of construction of the required number of latrines is a one off cost, the benefits are large. Here we show what the benefits would have been in terms of protection against Hepatitis E. However, other diseases due to poor sanitation that have been reported in Uganda, such as cholera and dysentery, could be prevented in the same way [7].

**Table 3.** Minimum cost for educating the IDC dwellers by twenty (20) Counsellors.

| Item                                   | Cost per Item (USD) | No. of Days/Nights      | Total cost (USD) |
|----------------------------------------|---------------------|-------------------------|------------------|
| Hotel                                  | 50                  | $30 \times 20$          | 30,000           |
| Meals                                  | 50                  | $30 \times 2 \times 20$ | 60,000           |
| Transport to, within and from the Camp | 20                  | $30 \times 20$          | 12,000           |
| Transport to and from Kitgum           | 100                 | 20                      | 2,000            |
| Total Costs                            | –                   | –                       | 104,000          |

Table for estimates of educational costs over a month's period.  
doi:10.1371/journal.pone.0041135.t003

We have also considered co-infection with malaria. If we assume that presence of malaria during a Hepatitis *E* outbreak increases persistence infection, then we estimate that a malaria infective can be infected with Hepatitis *E* up to 16 times more than one without malaria. The critical value of  $\xi$  determined in this study agrees with prior studies showing increased susceptibility to other infections for malaria infected individuals [37]. However, this last result is speculative and the more important point is the relationship given in Figure 3 between co-infection and other model parameters.

## Supporting Information

### Supporting Information S1 Linear regression on system 7.

(TEX)

## References

- Cyranoski D (2004) Outbreak of chicken flu rattles Hong Kong. *Nature*. 412: 261.
- Lipsitch M, Cohen T, Cooper B, Robins JM, Ma S, et al. (2003) Transmission dynamics and control of severe acute respiratory syndrome. *Science* 300: 1966–1970.
- Macdonald G (1957) *The Epidemiology and Control of Malaria*. Oxford: Oxford University Press.
- Kermack WO, McKendrick AG (1927) A contribution to the mathematical theory of epidemics. *Proc R Soc London* 115: 700–721.
- King AA, Ionides EL, Pascual M, Bouma MJ (2008) Inapparent infections and cholera dynamics. *Nature* 454(7206): 877–80.
- Rohani P, Earn D, Grenfell B (2000) Impact of immunisation on pertussis transmission in England and Wales. *Lancet* 355: 285–286.
- Ministry of Health Uganda Weekly Report. (2009) Available: <http://www.health.go.ug/>. Accessed 2009 Oct 27.
- Castillo-Chavez C, Blower S, van den Driessche P, Kirschner D, Yakubu A-A (2002) *Mathematical Approaches for Emerging and Re emerging Infectious Diseases: An Introduction*. Springer New York.
- Gubler DJ (2002) The global emergence/resurgence of arboviral diseases as public health problems. *Arch Med Res* 33: 330–342.
- Enserink M (2004) Emerging infectious diseases: A global fire brigade responds to disease outbreaks. *Science*. 303: 1605–1606.
- WHO Report. (2009) Available: <http://www.who.int/countries/uga/en/>. Accessed 2009 Oct 26.
- Klouwensberg PK, Sasi P, Bashraheil M, Awuondo K, Bonten M, et al. (2011) Temporal association of acute Hepatitis *A* and *Plasmodium falciparum* malaria in children. *PLoS one* 6(7): e21013
- Thursz MR, Kwiatkowski D, Torok ME, Allsopp CEM, Greenwood BM, et al. (1995) Association of hepatitis B surface antigen carriage with severe malaria in Gambian children. *Nature Medicine*. 1: 374–375.
- Barcus MJ, Hien TT, White NJ, Laras K, Farrar J, et al. (2002) Short Report: Hepatitis B infection and severe *Plasmodium falciparum* in Vietnamese adults. *Am J Trop Med Hyg* 66(2): 140–142.
- Andrade BB, Santos CJN, Camargo LM, Souza-Neto SM, Reis-Filho A, et al. (2001) Hepatitis B Infection Is Associated with Asymptomatic Malaria in the Brazilian Amazon. *PLoS ONE*. 6(5): e19841.
- Pasquetto V, Guidotti LG, Kakimi K, Tsuji M, Chisari FV (2002) Host-Virus Interactions during Malaria Infection in Hepatitis B Virus Transgenic Mice. *J Exp Med* 192(4): 529–36.
- Ferguson NM, Anderson R, Gupta S (1999) The effect of antibody-dependent enhancement on the transmission dynamics and persistence of multiple-strain pathogens. *Proceedure of National Academy of Sciences USA* 96: 790–794.
- Gupta S, Ferguson N, Anderson R (1998) Chaos persistence and evolution of strain structure in antigenically diverse infectious agents. *Science*. 280: 912–915.
- Gupta S, Swinton J, Anderson RM (1994) Theoretical-studies of the effects of heterogeneity in the parasite population on the transmission dynamics of malaria. *Proc Roy Soc London Ser B-Biol Sci* 256: 231–238.
- Read AF, Taylor LH (2001) The ecology of genetically diverse infections. *Science* 292: 1099–1102.
- Earn DJD, Dushoff J, Levin SA (2002) Ecology and evolution of the flu. *Trends Ecol Evol* 17: 334–340.
- Koelle K, Rodo X, Pascual M, Yunus M, Mostafa G (2005) Refractory periods and climate forcing in cholera dynamics. *Nature* 436: 696–700.
- Humanitarian clusters Uganda. (2009) Available: <http://www.ugandacusters.ug/>. Accessed 2009 Oct 26.
- Anderson RM, May RM (1991) *Infectious Diseases of Humans: Dynamics and Control*. Oxford University Press, Oxford.
- Vasco DA, Wearing HJ, Rohan P (2007) Tracking the dynamics of pathogen interactions: Modeling ecological and immune-mediated process in a two-pathogen single-host system. *J Theor Bio* 245: 9–25.
- Centers for disease control and prevention. Hepatitis *E* information for health professionals. (2009) Available: <http://www.cdc.gov/hepatitis/HEV/HEVfaq.html>. Accessed 2009 Oct 28.
- Keeling MJ, Rohani P (2008) *Modelling infectious diseases in humans and animals*. Princeton University Press.
- Edelstein-Keshet L (2005) *Mathematical Models in Biology*. SIAM Classics in Applied Mathematics 46. McGraw-Hill College.
- Maiwald T, Timmer J (2008) Dynamical modeling and multi-experiment fitting with PottersWheel. *Bioinformatics* 24(18): 2037–2043.
- van den Driessche P, Watmough J (2002) Reproduction numbers and sub-threshold endemic equilibria for compartmental models of disease transmission. *Mathematical Biosciences* 180: 29–48.
- North Dakota Department of Health. (2005) Available: <http://www.ndmch.com/publications/DiseaseFactSheets/HepatitisE.pdf>. Accessed 2009 Oct 28.
- NSW Government Health. (2011) Available: <http://www.health.nsw.gov.au/factsheets/infectious/hepatitise.html>. Accessed 2011 Sep 13.
- Murray CJL, Lopez AD (1996) *The global burden of disease: a comprehensive assessment of mortality and disability from diseases injuries and risk factors in 1990 and projected to 2020*. Cambridge MA: Harvard University Press for the World Health Organization and World Bank.
- World Health Organization. (2009) Available: <http://www.who.int/healthinfo/global-burden-disease/en/>. Accessed 2009 Oct 26.
- World Health Organization. (2009) Available: <http://www.afro.who.int/home/countries/fact-sheets/uganda.pdf>. Accessed 2009 Oct 26.
- Gold MR, Siegel JE, Russell LB (1996) *Cost-effectiveness in health and medicine*. New York: Oxford University Press.
- Abu-Raddad LJ, Patnaik P, Kublin JG (2006) Dual Infection with HIV and Malaria Fuels the Spread of Both Diseases in Sub-Saharan Africa. *Science* 314(5805): 1603–1606.

### Supporting Information S2 The endemic stationary points for the co-infection model.

(TEX)

### Supporting Information S3 The invasability criterion for the co-infection model.

(TEX)

## Acknowledgments

Thank you to the EAUMP Makerere University Uganda, Dr. Sankaran, and the Mathematical Biology team of the Department of Mathematical Sciences, Bath University, UK. The authors thank Prof. Tom Britton for many useful suggestions on an earlier version of this manuscript.

## Author Contributions

Analyzed the data: BN DJTS. Wrote the paper: BN DJTS. Model analysis: JYTM LSL.
