# Supplementary material for: The Dynamics, Causes and Possible Prevention of Hepatitis E Outbreaks
Source: PLoS One. 2012 Jul 24;7(7):e41135. doi: 10.1371/journal.pone.0041135 (PMC3404073; doi:10.1371/journal.pone.0041135)
Supplement: Supporting Information S2 — The endemic stationary points for the co-infection model. (TEX) [file pone.0041135.s002.tex]

% Template for PLoS
% Version 1.0 January 2009
%
% To compile to pdf, run:
% latex plos.template
% bibtex plos.template
% latex plos.template
% latex plos.template
% dvipdf plos.template

\documentclass[10pt]{article}

% amsmath package, useful for mathematical formulas
\usepackage{amsmath}
\usepackage{amsfonts}
\usepackage{wasysym}
\usepackage[table]{xcolor}
\usepackage{graphics}
\usepackage{pxfonts}
\usepackage{txfonts}
\usepackage{graphicx}
\usepackage{multimedia}
\usepackage{amssymb}
\usepackage{epsfig,bezier}
\usepackage{anysize}
\usepackage{verbatim}
\newtheorem{eqn}{Equation}[section]
\newtheorem{app}{Appendix}
\usepackage{graphicx}
\usepackage{amssymb, appendix,graphics}
\usepackage{lineno}
%\usepackage{natbib}
\usepackage{url}
\usepackage{epsfig,amsfonts,graphicx,bezier,amssymb}
\usepackage{xcolor}

% graphicx package, useful for including eps and pdf graphics
% include graphics with the command \includegraphics

% cite package, to clean up citations in the main text. Do not remove.
\usepackage{cite}

\usepackage{color} 

% Use doublespacing - comment out for single spacing
%\usepackage{setspace} 
%\doublespacing


% Text layout
\topmargin 0.0cm
\oddsidemargin 0.5cm
\evensidemargin 0.5cm
\textwidth 16cm 
\textheight 21cm

% Bold the 'Figure #' in the caption and separate it with a period
% Captions will be left justified
\usepackage[labelfont=bf,labelsep=period,justification=raggedright]{caption}

% Use the PLoS provided bibtex style
%\bibliographystyle{plos2009}

% Remove brackets from numbering in List of References
\makeatletter
\renewcommand{\@biblabel}[1]{\quad#1.}
\makeatother


% Leave date blank
\date{}

\pagestyle{myheadings}
%% ** EDIT HERE **


%% ** EDIT HERE **
%% PLEASE INCLUDE ALL MACROS BELOW

%% END MACROS SECTION

\begin{document}

\begin{appendices}
\section*{S2 The endemic stationary points for the co-infection model}
In this section we show how the endemic equilibrium point of the co-infection model is derived. From equation (13) at steady state of the first two equations, we have 
\begin{eqnarray}\begin{array}{l}\mathrm{
rM_*-(f+\beta \rho(1-l)(1-b)I_*+\mu) S_*=fS_*-(r+\xi\beta\rho(1-l)(1-b)I_* +\mu) M _*}~~\textrm{implies}\\
\mathrm{\left(f+\beta \rho(1-l)(1-b)I_*+\mu\right )\times \left (r+\xi\beta\rho(1-l)(1-b)I_* +\mu\right )=fr,} ~~\textrm{collecting like terms gives}\\
\mathrm{\xi[\beta\rho(1-l)(1-b)]^2I_*^2+\beta\rho(1-l)(1-b)[\xi(\mu+f)+(\mu+r)]I_*+\mu(\mu+f+r)=0~~\mbox{equivalent to}}\\
\mathrm{{I_*^2+\frac{\xi(\mu+f)+(\mu+r)}{\xi\beta\rho(1-l)(1-b)}I_*+\frac{\mu(\mu+f+r)}{\xi[\beta\rho(1-l)(1-b)]^2}=0}}
\end{array}\end{eqnarray}
of the form $\mathrm{I^2+yI+z}=0.$ Note that both $y$ and $z$ are greater than zero. Thus we have \begin{eqnarray}
\mathrm{I_*}=\mathrm{\frac{\xi(\mu+f)+(\mu+r)}{2\xi\beta\rho(1-l)(1-b)}\left[-1\pm \frac{2\sqrt{\xi\mu(\mu+f+r)}}{\xi(\mu+f)+(\mu+r)}\sqrt{\frac{[\xi(\mu+f)+(\mu+r)]^2}{4\xi\mu(\mu+f+r)}-1}\right]}
\end{eqnarray}
The rest of the equilibrium states for $\mathrm{S_*,~~M_*,~~E_*}$ and $\mathrm{R_*}$ can be obtained by substituting for $\mathrm{I_*}$ in equation (13) at steady state. 
\end{appendices}
\end{document}
